# Supplementary material
Source: Frontiers journal article supplement (https://www.frontiersin.org/articles/521530)
Supplement: Data_Sheet_1.PDF [file Data_Sheet_1.PDF]

Supplemental table 1 Protocols for image acquisition.

|                                             | Reconstruction thickness<br>(mm) | Tube voltage<br>(KV) | Tube current<br>(mAs) | Rotation time<br>(s) | Acquisition matrix |
|---------------------------------------------|----------------------------------|----------------------|-----------------------|----------------------|--------------------|
| <b>Siemens SOMATOM<br/>Definition Flash</b> | 2.0                              | 120                  | smart                 | 0.5                  | 512*512            |
| <b>Siemens FORCE CT</b>                     | 2.0                              | 100                  | smart                 | 0.5                  | 512*512            |
| <b>Siemens Sensation16</b>                  | 2.0                              | 120                  | smart                 | 0.5                  | 512*512            |
| <b>Siemens Definition AS 40</b>             | 2.0                              | 120                  | smart                 | 0.5                  | 512*512            |
| <b>Siemens Definition AS 20</b>             | 1.5                              | 120                  | smart                 | 0.5                  | 512*512            |
| <b>GE LightSpeed VCT</b>                    | 1.25                             | 120                  | smart                 | 0.5                  | 512*512            |

Supplemental table 2 List of all extracted radiomic features.

| Feature types          | n   |
|------------------------|-----|
| First order features   | 19  |
| 2D/3D Shape features   | 26  |
| GLCM based features    | 24  |
| GLRLM based features   | 16  |
| GLSZM based features   | 16  |
| NGZDM based features   | 5   |
| GLDM based features    | 14  |
| LOG based features     | 172 |
| Wavelet based features | 668 |

GLCM, gray level co-occurrence matrix; GLRLM, gray level run length matrix; GLSZM, gray level size zone matrix; NGSZM, neighbouring gray size zone matrix; GLDM, gray level dependence matrix; LOG, Laplacian-of-Gaussian.

Supplemental table 3 Selected radiomic features of pGGNs in training and test cohort.

|           | Training cohort                                                  |                                                                  |                                                                  |          | Test cohort                                                      |                                                                   |                                                                  |          |
|-----------|------------------------------------------------------------------|------------------------------------------------------------------|------------------------------------------------------------------|----------|------------------------------------------------------------------|-------------------------------------------------------------------|------------------------------------------------------------------|----------|
|           | Total                                                            | AIS/MIA                                                          | IVA                                                              | <i>P</i> | Total                                                            | AIS/MIA                                                           | IVA                                                              | <i>P</i> |
| <b>R1</b> | 7*10 <sup>-3</sup> (1*10 <sup>-3</sup> , 82*10 <sup>-3</sup> )   | 10*10 <sup>-3</sup> (3*10 <sup>-3</sup> , 82*10 <sup>-3</sup> )  | 5*10 <sup>-3</sup> (1*10 <sup>-3</sup> , 19*10 <sup>-3</sup> )   | <0.001   | 6*10 <sup>-3</sup> (2*10 <sup>-3</sup> , 41*10 <sup>-3</sup> )   | 10*10 <sup>-3</sup> (3*10 <sup>-3</sup> , 41*10 <sup>-3</sup> )   | 5*10 <sup>-3</sup> (2*10 <sup>-3</sup> , 29*10 <sup>-3</sup> )   | <0.001   |
| <b>R2</b> | 8.1 (3.9, 10.0)                                                  | 7.6 (3.9, 9.2)                                                   | 8.5 (6.5, 10.0)                                                  | <0.001   | 8.3 (5.2, 10.0)                                                  | 7.5 (5.2, 9.3)                                                    | 8.6 (5.7, 10.0)                                                  | <0.001   |
| <b>R3</b> | 6.3 (3.0, 7.5)                                                   | 5.9 (3.0, 7.2)                                                   | 6.5 (5.0, 7.5)                                                   | <0.001   | 6.4 (4.2, 7.4)                                                   | 6.1 (4.2, 7.3)                                                    | 6.7 (4.6, 7.4)                                                   | <0.001   |
| <b>R4</b> | 5*10 <sup>-3</sup> (1*10 <sup>-3</sup> , 83*10 <sup>-3</sup> )   | 7*10 <sup>-3</sup> (2*10 <sup>-3</sup> , 83*10 <sup>-3</sup> )   | 4*10 <sup>-3</sup> (1*10 <sup>-3</sup> , 12*10 <sup>-3</sup> )   | <0.001   | 4*10 <sup>-3</sup> (1*10 <sup>-3</sup> , 28*10 <sup>-3</sup> )   | 7*10 <sup>-3</sup> (2*10 <sup>-3</sup> , 28*10 <sup>-3</sup> )    | 3*10 <sup>-3</sup> (1*10 <sup>-3</sup> , 21*10 <sup>-3</sup> )   | <0.001   |
| <b>R5</b> | 8.2 (1.6, 104.8)                                                 | 5.9 (1.6, 46.1)                                                  | 12.3 (3.9, 104.8)                                                | <0.001   | 9.0 (2.5, 45.6)                                                  | 5.8 (2.5, 16.4)                                                   | 11.3 (2.5, 45.6)                                                 | <0.001   |
| <b>R6</b> | 7.4 (1.6, 93.7)                                                  | 5.1 (1.6, 52.0)                                                  | 10.7 (2.4, 93.7)                                                 | <0.001   | 7.4 (1.9, 38.7)                                                  | 4.4 (1.9, 15.4)                                                   | 9.9 (2.0, 38.7)                                                  | <0.001   |
| <b>R7</b> | 4.2 (1.0, 19.4)                                                  | 3.0 (1.0, 10.9)                                                  | 5.6 (1.8, 19.4)                                                  | <0.001   | 5.0 (1.0, 17.)                                                   | 3.0 (1.0, 8.0)                                                    | 5.9 (1.3, 17.7)                                                  | <0.001   |
| <b>R8</b> | 108.0 (5.8, 1874.6)                                              | 62.0 (5.8, 809.2)                                                | 179.2 (29.2, 1874.6)                                             | <0.001   | 121.9 (16.6, 786.9)                                              | 62.8 (16.6, 245.5)                                                | 166.3 (17.8, 786.9)                                              | <0.001   |
| <b>R9</b> | 43*10 <sup>-3</sup> (4*10 <sup>-3</sup> , 687*10 <sup>-3</sup> ) | 74*10 <sup>-3</sup> (6*10 <sup>-3</sup> , 687*10 <sup>-3</sup> ) | 32*10 <sup>-3</sup> (4*10 <sup>-3</sup> , 164*10 <sup>-3</sup> ) | <0.001   | 39*10 <sup>-3</sup> (4*10 <sup>-3</sup> , 488*10 <sup>-3</sup> ) | 62*10 <sup>-3</sup> (10*10 <sup>-3</sup> , 488*10 <sup>-3</sup> ) | 34*10 <sup>-3</sup> (4*10 <sup>-3</sup> , 258*10 <sup>-3</sup> ) | <0.001   |

Continuous variables were represented in median (minimum, maximum) without any special statement. pGGNs = pure ground glass nodules; AIS = adenocarcinoma in situ; MIA = minimally invasive adenocarcinoma; IVA = invasive adenocarcinoma; R1 = wavelet-LLL\_glcM\_MaximumProbability; R2 = original\_glcM\_JointEntropy; R3 = wavelet-LLL\_glcM\_SumEntropy; R4 = original\_glcM\_JointEnergy; R5 = log-sigma-1-0-mm-3D\_glszm\_GrayLevelNonUniformity; R6 = wavelet-LLH\_glszm\_GrayLevelNonUniformity; R7 = log-sigma-3-0-mm-3D\_glszm\_GrayLevelNonUniformity; R8 = original\_glszm\_SizeZoneNonUniformity; R9 = log-sigma-3-0-mm-3D\_glrIm\_LowGrayLevelRunEmphasis.

Supplemental Table 4 The ROC analysis of three predictive models in training and test cohort.

|                 |              | <b>Radiomic</b> | <b>Conventional</b> | <b>Combined</b> | <b><math>P_1</math></b> | <b><math>P_2</math></b> | <b><math>P_3</math></b> |
|-----------------|--------------|-----------------|---------------------|-----------------|-------------------------|-------------------------|-------------------------|
| <b>Training</b> | <b>AUC</b>   | 0.850           | 0.853               | 0.850           | 0.859                   | 0.995                   | 0.846                   |
|                 | <b>95%CI</b> | 0.803~0.897     | 0.807~0.900         | 0.803~0.896     |                         |                         |                         |
| <b>Test</b>     | <b>AUC</b>   | 0.833           | 0.824               | 0.848           | 0.775                   | 0.608                   | 0.452                   |
|                 | <b>95%CI</b> | 0.733~0.934     | 0.723~0.924         | 0.750~0.946     |                         |                         |                         |

AUC = area under the curve; *CI* = confidence index;  $P_1$  = Radiomic vs Conventional;  $P_2$  = Radiomic vs Combined;  $P_3$  = Conventional vs Combined.

Supplemental Table 5 predictive results of models and radiologists in test cohort.

|                    | <b>Radiomic</b> | <b>Conventional</b> | <b>Combined</b> | <b>A</b> | <b>B</b> | <b>A+R</b> | <b>B+R</b> |
|--------------------|-----------------|---------------------|-----------------|----------|----------|------------|------------|
| <b>Accuracy</b>    | 76.56%          | 71.88%              | 78.13%          | 73.44%   | 59.38%   | 79.69%     | 75.00%     |
| <b>Sensitivity</b> | 82.35%          | 82.35%              | 91.18%          | 61.76%   | 50.00%   | 79.41%     | 82.35%     |
| <b>Specificity</b> | 70.00%          | 60.00%              | 63.33%          | 86.67%   | 70.00%   | 80.00%     | 66.67%     |
| <b>PPV</b>         | 75.68%          | 70.00%              | 73.81%          | 84.00%   | 65.38%   | 81.82%     | 73.68%     |
| <b>NPV</b>         | 77.78%          | 75.00%              | 86.36%          | 66.67%   | 55.26%   | 77.42%     | 76.92%     |
| <b>MR</b>          | 30.00%          | 40.00%              | 36.67%          | 13.33%   | 30.00%   | 20.00%     | 33.33%     |
| <b>MDR</b>         | 17.65%          | 17.65%              | 8.82%           | 38.24%   | 50.00%   | 20.59%     | 17.65%     |

A, the first binary diagnosis of the senior radiologist with 10-year experience in thoracic imaging diagnosis in test cohort; B, the first binary diagnosis of the junior radiologist with 2-year experience in medical imaging diagnosis in test cohort; A+R, the second binary diagnosis of radiologist A in test cohort with the aid of radiomic predictive model; B+R, the second binary diagnosis of radiologist B in test cohort with the aid of radiomic predictive model; PPV = positive predictive value; NPV = negative predictive value; MR = misdiagnosis rate; MDR = missed diagnosis rate.

Supplemental table 6 Distribution of each features in training and test cohort.

|                        | Total                                                               | Training cohort                                                     | Test cohort                                                         | <i>P</i> |
|------------------------|---------------------------------------------------------------------|---------------------------------------------------------------------|---------------------------------------------------------------------|----------|
|                        | 322                                                                 | 258                                                                 | 64                                                                  |          |
| <b>Pathology</b>       |                                                                     |                                                                     |                                                                     |          |
| <b>AIS/MIA</b>         | 150 (46.6%)                                                         | 120 (46.5%)                                                         | 30 (46.9%)                                                          | 0.958    |
| <b>IVA</b>             | 172 (53.4%)                                                         | 138 (53.5%)                                                         | 34 (53.1%)                                                          |          |
| <b>Gender</b>          |                                                                     |                                                                     |                                                                     |          |
| <b>Male</b>            | 82 (25.5%)                                                          | 70 (27.1%)                                                          | 12 (18.8%)                                                          | 0.168    |
| <b>Female</b>          | 240 (74.5%)                                                         | 188 (72.9%)                                                         | 52 (81.3%)                                                          |          |
| <b>Age(year)</b>       | 53 (25, 78)                                                         | 53 (25, 78)                                                         | 54 (30, 72)                                                         | 0.618    |
| <b>Smoking history</b> |                                                                     |                                                                     |                                                                     |          |
| <b>Never</b>           | 289 (89.8%)                                                         | 230 (89.1%)                                                         | 59 (92.2%)                                                          | 0.474    |
| <b>Current or ever</b> | 33 (10.2%)                                                          | 28 (10.9%)                                                          | 5 (7.8%)                                                            |          |
| <b>Diameter (cm)</b>   | 0.94 (0.24, 2.94)                                                   | 0.94 (0.24, 2.94)                                                   | 0.93 (0.34, 2.04)                                                   | 0.796    |
| <b>Density (HU)</b>    | -571.0 (-829.2, -122.5)                                             | -583.0 (-829.2, -122.5)                                             | -525.8 (-763.2, -179.8)                                             | 0.138    |
| <b>R1</b>              | 7*10 <sup>-3</sup> (1*10 <sup>-3</sup> ,<br>82*10 <sup>-3</sup> )   | 7*10 <sup>-3</sup> (1*10 <sup>-3</sup> ,<br>82*10 <sup>-3</sup> )   | 6*10 <sup>-3</sup> (2*10 <sup>-3</sup> , 41*10 <sup>-3</sup> )      | 0.766    |
| <b>R2</b>              | 8.1 (3.9, 10.0)                                                     | 8.1 (3.9, 10.0)                                                     | 8.3 (5.2, 10.0)                                                     | 0.823    |
| <b>R3</b>              | 6.3 (3.0, 7.5)                                                      | 6.3 (3.0, 7.5)                                                      | 6.4 (4.2, 7.4)                                                      | 0.548    |
| <b>R4</b>              | 5*10 <sup>-3</sup> (1*10 <sup>-3</sup> ,<br>83*10 <sup>-3</sup> )   | 5*10 <sup>-3</sup> (1*10 <sup>-3</sup> ,<br>83*10 <sup>-3</sup> )   | 4*10 <sup>-3</sup> (1*10 <sup>-3</sup> , 28*10 <sup>-3</sup> )      | 0.662    |
| <b>R5</b>              | 8.4 (1.6, 104.8)                                                    | 8.2 (1.6, 104.8)                                                    | 9.0 (2.5, 45.6)                                                     | 0.753    |
| <b>R6</b>              | 7.4 (1.6, 93.7)                                                     | 7.4 (1.6, 93.7)                                                     | 7.4 (1.9, 38.7)                                                     | 0.718    |
| <b>R7</b>              | 4.3 (1.0, 19.4)                                                     | 4.2 (1.0, 19.4)                                                     | 5.0 (1.0, 17.)                                                      | 0.655    |
| <b>R8</b>              | 110.6 (5.8, 1874.6)                                                 | 108.0 (5.8, 1874.6)                                                 | 121.9 (16.6, 786.9)                                                 | 0.945    |
| <b>R9</b>              | 43*10 <sup>-3</sup> (4*10 <sup>-3</sup> ,<br>687*10 <sup>-3</sup> ) | 43*10 <sup>-3</sup> (4*10 <sup>-3</sup> ,<br>687*10 <sup>-3</sup> ) | 39*10 <sup>-3</sup> (4*10 <sup>-3</sup> ,<br>488*10 <sup>-3</sup> ) | 0.452    |

We set training and test cohort randomly by a ratio of 4:1. For each feature, there was no significant difference between pGGN-like AIS/MIA and IVA. Continuous variables were represented in median (minimum, maximum) without any special statement. pGGNs = pure ground glass nodules; AIS =

adenocarcinoma in situ; MIA = minimally invasive adenocarcinoma; IVA = invasive adenocarcinoma; R1 = wavelet-LLL\_glcM\_MaximumProbability; R2 = original\_glcM\_JointEntropy; R3 = wavelet-LLL\_glcM\_SumEntropy; R4 = original\_glcM\_JointEnergy; R5 = log-sigma-1-0-mm-3D\_glszm\_GrayLevelNonUniformity; R6 = wavelet-LLH\_glszm\_GrayLevelNonUniformity; R7 = log-sigma-3-0-mm-3D\_glszm\_GrayLevelNonUniformity; R8 = original\_glszm\_SizeZoneNonUniformity; R9 = log-sigma-3-0-mm-3D\_glrIm\_LowGrayLevelRunEmphasis.
